# Supplementary material for: Interprofessional differences in preoperative planning—the individualist surgeon
Source: Springer Nature journal article supplement (doi:10.1007/s10353-022-00761-z), 2022-05-02
Supplement: MOESM1 [file 20364204]

## Appendix:

### Survey for the surgeons:

|      |                                                                                                                                                                                                               |  |  |  |   |                                                                     |
|------|---------------------------------------------------------------------------------------------------------------------------------------------------------------------------------------------------------------|--|--|--|---|---------------------------------------------------------------------|
| Q1   | What is your age                                                                                                                                                                                              |  |  |  | 1 | 20-30                                                               |
|      |                                                                                                                                                                                                               |  |  |  | 2 | 31-40                                                               |
|      |                                                                                                                                                                                                               |  |  |  | 3 | 41-50                                                               |
|      |                                                                                                                                                                                                               |  |  |  | 4 | 51-60                                                               |
|      |                                                                                                                                                                                                               |  |  |  | 5 | 61-70                                                               |
|      |                                                                                                                                                                                                               |  |  |  | 6 | >70                                                                 |
| Q2   | What is your gender                                                                                                                                                                                           |  |  |  | 1 | female                                                              |
|      |                                                                                                                                                                                                               |  |  |  | 2 | male                                                                |
| Q3   | In which surgical specialty are you working                                                                                                                                                                   |  |  |  | 1 | General Surgery                                                     |
|      |                                                                                                                                                                                                               |  |  |  | 2 | Colorectal Surgery                                                  |
|      |                                                                                                                                                                                                               |  |  |  | 3 | Upper GI Surgery                                                    |
|      |                                                                                                                                                                                                               |  |  |  | 4 | Bariatric/Endocrine Surgery                                         |
|      |                                                                                                                                                                                                               |  |  |  | 5 | Orthopedic/Trauma Surgery                                           |
|      |                                                                                                                                                                                                               |  |  |  | 6 | Other Surgical Specialty (ENT, Urology, Gynaecology, Ophthalmology) |
|      |                                                                                                                                                                                                               |  |  |  | 7 | Other non surgical specialty                                        |
|      |                                                                                                                                                                                                               |  |  |  | 8 | Not a medical professional                                          |
| Q4   | What type of hospital do you work at                                                                                                                                                                          |  |  |  | 1 | General                                                             |
|      |                                                                                                                                                                                                               |  |  |  | 2 | District                                                            |
|      |                                                                                                                                                                                                               |  |  |  | 3 | Specialised                                                         |
| Q5   | At what Level of institutional/hospital hierarchy are you currently working                                                                                                                                   |  |  |  | 1 | Senior or Chief Consultant                                          |
|      |                                                                                                                                                                                                               |  |  |  | 2 | Junior Consultant                                                   |
|      |                                                                                                                                                                                                               |  |  |  | 3 | Doctor in Training                                                  |
|      |                                                                                                                                                                                                               |  |  |  | 4 | Nurse                                                               |
|      |                                                                                                                                                                                                               |  |  |  | 5 | Self employed/Private Practice                                      |
|      |                                                                                                                                                                                                               |  |  |  | 6 | Others                                                              |
| Q6.1 | Improvement in surgical treatment quality is needed in the following categories: Structure (Context in which care is delivered: Utilities, Financing, Staff)                                                  |  |  |  | 1 | strongly disagree                                                   |
|      |                                                                                                                                                                                                               |  |  |  | 2 | disagree                                                            |
|      |                                                                                                                                                                                                               |  |  |  | 3 | not decided                                                         |
|      |                                                                                                                                                                                                               |  |  |  | 4 | agree                                                               |
|      |                                                                                                                                                                                                               |  |  |  | 5 | strongly agree                                                      |
| Q6.2 | Improvement in surgical treatment quality is needed in the following categories: Process (Transaction between patients and providers)                                                                         |  |  |  | 1 | strongly disagree                                                   |
|      |                                                                                                                                                                                                               |  |  |  | 2 | disagree                                                            |
|      |                                                                                                                                                                                                               |  |  |  | 3 | not decided                                                         |
|      |                                                                                                                                                                                                               |  |  |  | 4 | agree                                                               |
|      |                                                                                                                                                                                                               |  |  |  | 5 | strongly agree                                                      |
| Q6.3 | Improvement in surgical treatment quality is needed in the following categories: Outcome Measurement (Effects of healthcare on the health status of patients)                                                 |  |  |  | 1 | strongly disagree                                                   |
|      |                                                                                                                                                                                                               |  |  |  | 2 | disagree                                                            |
|      |                                                                                                                                                                                                               |  |  |  | 3 | not decided                                                         |
|      |                                                                                                                                                                                                               |  |  |  | 4 | agree                                                               |
|      |                                                                                                                                                                                                               |  |  |  | 5 | strongly agree                                                      |
|      |                                                                                                                                                                                                               |  |  |  | 1 | no Comment given                                                    |
|      |                                                                                                                                                                                                               |  |  |  | 2 | Comment given                                                       |
| Q7.1 | Please rank the following categories according to their capability to improve overall quality (1 biggest impact, 3 lowest impact) Structure (Context in which care is delivered: Utilities, Financing, Staff) |  |  |  | 1 | highest impact                                                      |
|      |                                                                                                                                                                                                               |  |  |  | 2 |                                                                     |
|      |                                                                                                                                                                                                               |  |  |  | 3 | lowest impact                                                       |
| Q7.2 | Please rank the following categories according to their capability to improve overall quality (1 biggest impact, 3 lowest impact) Structure (Context in which care is delivered: Utilities, Financing, Staff) |  |  |  | 1 | highest impact                                                      |

|      |                                                                                                                                                                                                                                                          |  |  |  |   |                   |
|------|----------------------------------------------------------------------------------------------------------------------------------------------------------------------------------------------------------------------------------------------------------|--|--|--|---|-------------------|
|      |                                                                                                                                                                                                                                                          |  |  |  | 2 |                   |
|      |                                                                                                                                                                                                                                                          |  |  |  | 3 | lowest impact     |
| Q7.3 | Please rank the following categories according to their capability to improve overall quality (1 biggest impact, 3 lowest impact) Structure (Context in which care is delivered: Utilities, Financing, Staff)                                            |  |  |  | 1 | highest impact    |
|      |                                                                                                                                                                                                                                                          |  |  |  | 2 |                   |
|      |                                                                                                                                                                                                                                                          |  |  |  | 3 | lowest impact     |
| Q8.1 | Concerning the "process" category the American College of Surgeons has defined several chronological steps describing the before mentioned category. In your opinion can an improvement in the following steps lead to an improvement in overall quality |  |  |  | 1 | strongly disagree |
|      |                                                                                                                                                                                                                                                          |  |  |  | 2 | disagree          |
|      |                                                                                                                                                                                                                                                          |  |  |  | 3 | not decided       |
|      |                                                                                                                                                                                                                                                          |  |  |  | 4 | agree             |
|      |                                                                                                                                                                                                                                                          |  |  |  | 5 | strongly agree    |
| Q8.2 | Concerning the "process" category the American College of Surgeons has defined several chronological steps describing the before mentioned category. In your opinion can an improvement in the following steps lead to an improvement in overall quality |  |  |  | 1 | strongly disagree |
|      |                                                                                                                                                                                                                                                          |  |  |  | 2 | disagree          |
|      |                                                                                                                                                                                                                                                          |  |  |  | 3 | not decided       |
|      |                                                                                                                                                                                                                                                          |  |  |  | 4 | agree             |
|      |                                                                                                                                                                                                                                                          |  |  |  | 5 | strongly agree    |
| Q8.3 | Concerning the "process" category the American College of Surgeons has defined several chronological steps describing the before mentioned category. In your opinion can an improvement in the following steps lead to an improvement in overall quality |  |  |  | 1 | strongly disagree |
|      |                                                                                                                                                                                                                                                          |  |  |  | 2 | disagree          |
|      |                                                                                                                                                                                                                                                          |  |  |  | 3 | not decided       |
|      |                                                                                                                                                                                                                                                          |  |  |  | 4 | agree             |
|      |                                                                                                                                                                                                                                                          |  |  |  | 5 | strongly agree    |
| Q8.4 | Concerning the "process" category the American College of Surgeons has defined several chronological steps describing the before mentioned category. In your opinion can an improvement in the following steps lead to an improvement in overall quality |  |  |  | 1 | strongly disagree |
|      |                                                                                                                                                                                                                                                          |  |  |  | 2 | disagree          |
|      |                                                                                                                                                                                                                                                          |  |  |  | 3 | not decided       |
|      |                                                                                                                                                                                                                                                          |  |  |  | 4 | agree             |
|      |                                                                                                                                                                                                                                                          |  |  |  | 5 | strongly agree    |
| Q8.5 | Concerning the "process" category the American College of Surgeons has defined several chronological steps describing the before mentioned category. In your opinion can an improvement in the following steps lead to an improvement in overall quality |  |  |  | 1 | strongly disagree |
|      |                                                                                                                                                                                                                                                          |  |  |  | 2 | disagree          |
|      |                                                                                                                                                                                                                                                          |  |  |  | 3 | not decided       |
|      |                                                                                                                                                                                                                                                          |  |  |  | 4 | agree             |
|      |                                                                                                                                                                                                                                                          |  |  |  | 5 | strongly agree    |
|      |                                                                                                                                                                                                                                                          |  |  |  | 1 | no Comment given  |
|      |                                                                                                                                                                                                                                                          |  |  |  | 2 | Comment given     |
| Q9.1 | Which of the following steps can improve overall quality AND need further investigation                                                                                                                                                                  |  |  |  | 1 | strongly disagree |
|      |                                                                                                                                                                                                                                                          |  |  |  | 2 | disagree          |
|      |                                                                                                                                                                                                                                                          |  |  |  | 3 | not decided       |
|      |                                                                                                                                                                                                                                                          |  |  |  | 4 | agree             |
|      |                                                                                                                                                                                                                                                          |  |  |  | 5 | strongly agree    |
| Q9.2 | Which of the following steps can improve overall quality AND need further investigation                                                                                                                                                                  |  |  |  | 1 | strongly disagree |
|      |                                                                                                                                                                                                                                                          |  |  |  | 2 | disagree          |
|      |                                                                                                                                                                                                                                                          |  |  |  | 3 | not decided       |
|      |                                                                                                                                                                                                                                                          |  |  |  | 4 | agree             |
|      |                                                                                                                                                                                                                                                          |  |  |  | 5 | strongly agree    |
| Q9.3 | Which of the following steps can improve overall quality AND need further investigation                                                                                                                                                                  |  |  |  | 1 | strongly disagree |
|      |                                                                                                                                                                                                                                                          |  |  |  | 2 | disagree          |
|      |                                                                                                                                                                                                                                                          |  |  |  | 3 | not decided       |

|       |                                                                                                                                  |  |  |  |   |                   |
|-------|----------------------------------------------------------------------------------------------------------------------------------|--|--|--|---|-------------------|
|       |                                                                                                                                  |  |  |  | 4 | agree             |
|       |                                                                                                                                  |  |  |  | 5 | strongly agree    |
| Q9.4  | Which of the following steps can improve overall quality AND need further investigation                                          |  |  |  | 1 | strongly disagree |
|       |                                                                                                                                  |  |  |  | 2 | disagree          |
|       |                                                                                                                                  |  |  |  | 3 | not decided       |
|       |                                                                                                                                  |  |  |  | 4 | agree             |
|       |                                                                                                                                  |  |  |  | 5 | strongly agree    |
| Q9.5  | Which of the following steps can improve overall quality AND need further investigation                                          |  |  |  | 1 | strongly disagree |
|       |                                                                                                                                  |  |  |  | 2 | disagree          |
|       |                                                                                                                                  |  |  |  | 3 | not decided       |
|       |                                                                                                                                  |  |  |  | 4 | agree             |
|       |                                                                                                                                  |  |  |  | 5 | strongly agree    |
|       |                                                                                                                                  |  |  |  | 1 | no Comment given  |
|       |                                                                                                                                  |  |  |  | 2 | Comment given     |
| Q10.1 | Looking at specific elements of the intraoperative phase of care the following element will have a big impact on overall quality |  |  |  | 1 | strongly disagree |
|       |                                                                                                                                  |  |  |  | 2 | disagree          |
|       |                                                                                                                                  |  |  |  | 3 | not decided       |
|       |                                                                                                                                  |  |  |  | 4 | agree             |
|       |                                                                                                                                  |  |  |  | 5 | strongly agree    |
| Q10.2 | Looking at specific elements of the intraoperative phase of care the following element will have a big impact on overall quality |  |  |  | 1 | strongly disagree |
|       |                                                                                                                                  |  |  |  | 2 | disagree          |
|       |                                                                                                                                  |  |  |  | 3 | not decided       |
|       |                                                                                                                                  |  |  |  | 4 | agree             |
|       |                                                                                                                                  |  |  |  | 5 | strongly agree    |
| Q10.3 | Looking at specific elements of the intraoperative phase of care the following element will have a big impact on overall quality |  |  |  | 1 | strongly disagree |
|       |                                                                                                                                  |  |  |  | 2 | disagree          |
|       |                                                                                                                                  |  |  |  | 3 | not decided       |
|       |                                                                                                                                  |  |  |  | 4 | agree             |
|       |                                                                                                                                  |  |  |  | 5 | strongly agree    |
| Q10.4 | Looking at specific elements of the intraoperative phase of care the following element will have a big impact on overall quality |  |  |  | 1 | strongly disagree |
|       |                                                                                                                                  |  |  |  | 2 | disagree          |
|       |                                                                                                                                  |  |  |  | 3 | not decided       |
|       |                                                                                                                                  |  |  |  | 4 | agree             |
|       |                                                                                                                                  |  |  |  | 5 | strongly agree    |
|       |                                                                                                                                  |  |  |  | 1 | no Comment given  |
|       |                                                                                                                                  |  |  |  | 2 | Comment given     |
| Q11.1 | What is your experience with intraoperative processes at your institution?                                                       |  |  |  | 1 | strongly disagree |
|       |                                                                                                                                  |  |  |  | 2 | disagree          |
|       |                                                                                                                                  |  |  |  | 3 | not decided       |
|       |                                                                                                                                  |  |  |  | 4 | agree             |
|       |                                                                                                                                  |  |  |  | 5 | strongly agree    |
| Q11.2 | What is your experience with intraoperative processes at your institution?                                                       |  |  |  | 1 | strongly disagree |
|       |                                                                                                                                  |  |  |  | 2 | disagree          |
|       |                                                                                                                                  |  |  |  | 3 | not decided       |
|       |                                                                                                                                  |  |  |  | 4 | agree             |
|       |                                                                                                                                  |  |  |  | 5 | strongly agree    |
|       |                                                                                                                                  |  |  |  | 1 | no Comment given  |
|       |                                                                                                                                  |  |  |  | 2 | Comment given     |
| Q12.1 | Concerning the team members and preoperative readiness                                                                           |  |  |  | 1 | strongly disagree |
|       |                                                                                                                                  |  |  |  | 2 | disagree          |
|       |                                                                                                                                  |  |  |  | 3 | not decided       |
|       |                                                                                                                                  |  |  |  | 4 | agree             |
|       |                                                                                                                                  |  |  |  | 5 | strongly agree    |
| Q12.2 | Concerning the team members and preoperative readiness                                                                           |  |  |  | 1 | strongly disagree |
|       |                                                                                                                                  |  |  |  | 2 | disagree          |
|       |                                                                                                                                  |  |  |  | 3 | not decided       |

|       |                                                                                                                                                                                  |  |  |  |   |                   |
|-------|----------------------------------------------------------------------------------------------------------------------------------------------------------------------------------|--|--|--|---|-------------------|
|       |                                                                                                                                                                                  |  |  |  | 4 | agree             |
|       |                                                                                                                                                                                  |  |  |  | 5 | strongly agree    |
| Q12.3 | Concerning the team members and preoperative readiness                                                                                                                           |  |  |  | 1 | strongly disagree |
|       |                                                                                                                                                                                  |  |  |  | 2 | disagree          |
|       |                                                                                                                                                                                  |  |  |  | 3 | not decided       |
|       |                                                                                                                                                                                  |  |  |  | 4 | agree             |
|       |                                                                                                                                                                                  |  |  |  | 5 | strongly agree    |
|       |                                                                                                                                                                                  |  |  |  | 1 | no Comment given  |
|       |                                                                                                                                                                                  |  |  |  | 2 | Comment given     |
| Q13.1 | The following team members of the operating team are informed about the indication for, the type of and the milestones of the procedure?                                         |  |  |  | 1 | strongly disagree |
|       |                                                                                                                                                                                  |  |  |  | 2 | disagree          |
|       |                                                                                                                                                                                  |  |  |  | 3 | not decided       |
|       |                                                                                                                                                                                  |  |  |  | 4 | agree             |
|       |                                                                                                                                                                                  |  |  |  | 5 | strongly agree    |
| Q13.2 | The following team members of the operating team are informed about the indication for, the type of and the milestones of the procedure?                                         |  |  |  | 1 | strongly disagree |
|       |                                                                                                                                                                                  |  |  |  | 2 | disagree          |
|       |                                                                                                                                                                                  |  |  |  | 3 | not decided       |
|       |                                                                                                                                                                                  |  |  |  | 4 | agree             |
|       |                                                                                                                                                                                  |  |  |  | 5 | strongly agree    |
| Q13.3 | The following team members of the operating team are informed about the indication for, the type of and the milestones of the procedure?                                         |  |  |  | 1 | strongly disagree |
|       |                                                                                                                                                                                  |  |  |  | 2 | disagree          |
|       |                                                                                                                                                                                  |  |  |  | 3 | not decided       |
|       |                                                                                                                                                                                  |  |  |  | 4 | agree             |
|       |                                                                                                                                                                                  |  |  |  | 5 | strongly agree    |
| Q13.4 | The following team members of the operating team are informed about the indication for, the type of and the milestones of the procedure?                                         |  |  |  | 1 | strongly disagree |
|       |                                                                                                                                                                                  |  |  |  | 2 | disagree          |
|       |                                                                                                                                                                                  |  |  |  | 3 | not decided       |
|       |                                                                                                                                                                                  |  |  |  | 4 | agree             |
|       |                                                                                                                                                                                  |  |  |  | 5 | strongly agree    |
|       |                                                                                                                                                                                  |  |  |  | 1 | no Comment given  |
|       |                                                                                                                                                                                  |  |  |  | 2 | Comment given     |
| Q14.1 | Please rank the following aspects in their capability to affect outcome                                                                                                          |  |  |  | 1 | highest impact    |
|       |                                                                                                                                                                                  |  |  |  | 2 |                   |
|       |                                                                                                                                                                                  |  |  |  | 3 | lowest impact     |
| Q14.2 | Please rank the following aspects in their capability to affect outcome                                                                                                          |  |  |  | 1 | highest impact    |
|       |                                                                                                                                                                                  |  |  |  | 2 |                   |
|       |                                                                                                                                                                                  |  |  |  | 3 | lowest impact     |
| Q14.3 | Please rank the following aspects in their capability to affect outcome                                                                                                          |  |  |  | 1 | highest impact    |
|       |                                                                                                                                                                                  |  |  |  | 2 |                   |
|       |                                                                                                                                                                                  |  |  |  | 3 | lowest impact     |
| Q15.1 | Addressing the improvement of intraoperative processes the following intervention will most likely be effective in avoiding intraoperative delays/variability of operation times |  |  |  | 1 | strongly disagree |
|       |                                                                                                                                                                                  |  |  |  | 2 | disagree          |
|       |                                                                                                                                                                                  |  |  |  | 3 | not decided       |
|       |                                                                                                                                                                                  |  |  |  | 4 | agree             |
|       |                                                                                                                                                                                  |  |  |  | 5 | strongly agree    |
| Q15.2 | Addressing the improvement of intraoperative processes the following intervention will most likely be effective in avoiding intraoperative delays/variability of operation times |  |  |  | 1 | strongly disagree |
|       |                                                                                                                                                                                  |  |  |  | 2 | disagree          |
|       |                                                                                                                                                                                  |  |  |  | 3 | not decided       |
|       |                                                                                                                                                                                  |  |  |  | 4 | agree             |
|       |                                                                                                                                                                                  |  |  |  | 5 | strongly agree    |
| Q15.3 | Addressing the improvement of intraoperative processes the following intervention will most likely be effective in avoiding intraoperative delays/variability of operation times |  |  |  | 1 | strongly disagree |
|       |                                                                                                                                                                                  |  |  |  | 2 | disagree          |
|       |                                                                                                                                                                                  |  |  |  | 3 | not decided       |

|       |                                                                                                                                                                                  |  |  |  |   |                   |
|-------|----------------------------------------------------------------------------------------------------------------------------------------------------------------------------------|--|--|--|---|-------------------|
|       |                                                                                                                                                                                  |  |  |  | 4 | agree             |
|       |                                                                                                                                                                                  |  |  |  | 5 | strongly agree    |
| Q15.4 | Addressing the improvement of intraoperative processes the following intervention will most likely be effective in avoiding intraoperative delays/variability of operation times |  |  |  | 1 | strongly disagree |
|       |                                                                                                                                                                                  |  |  |  | 2 | disagree          |
|       |                                                                                                                                                                                  |  |  |  | 3 | not decided       |
|       |                                                                                                                                                                                  |  |  |  | 4 | agree             |
|       |                                                                                                                                                                                  |  |  |  | 5 | strongly agree    |
| Q15.5 | Addressing the improvement of intraoperative processes the following intervention will most likely be effective in avoiding intraoperative delays/variability of operation times |  |  |  | 1 | strongly disagree |
|       |                                                                                                                                                                                  |  |  |  | 2 | disagree          |
|       |                                                                                                                                                                                  |  |  |  | 3 | not decided       |
|       |                                                                                                                                                                                  |  |  |  | 4 | agree             |
|       |                                                                                                                                                                                  |  |  |  | 5 | strongly agree    |
| Q15.6 | Addressing the improvement of intraoperative processes the following intervention will most likely be effective in avoiding intraoperative delays/variability of operation times |  |  |  | 1 | strongly disagree |
|       |                                                                                                                                                                                  |  |  |  | 2 | disagree          |
|       |                                                                                                                                                                                  |  |  |  | 3 | not decided       |
|       |                                                                                                                                                                                  |  |  |  | 4 | agree             |
|       |                                                                                                                                                                                  |  |  |  | 5 | strongly agree    |
|       |                                                                                                                                                                                  |  |  |  | 1 | no Comment given  |
|       |                                                                                                                                                                                  |  |  |  | 2 | Comment given     |
| Q16.1 | Addressing the improvement of intraoperative processes the following intervention will be effective in avoiding intraoperative complications                                     |  |  |  | 1 | strongly disagree |
|       |                                                                                                                                                                                  |  |  |  | 2 | disagree          |
|       |                                                                                                                                                                                  |  |  |  | 3 | not decided       |
|       |                                                                                                                                                                                  |  |  |  | 4 | agree             |
|       |                                                                                                                                                                                  |  |  |  | 5 | strongly agree    |
| Q16.2 | Addressing the improvement of intraoperative processes the following intervention will be effective in avoiding intraoperative complications                                     |  |  |  | 1 | strongly disagree |
|       |                                                                                                                                                                                  |  |  |  | 2 | disagree          |
|       |                                                                                                                                                                                  |  |  |  | 3 | not decided       |
|       |                                                                                                                                                                                  |  |  |  | 4 | agree             |
|       |                                                                                                                                                                                  |  |  |  | 5 | strongly agree    |
| Q16.3 | Addressing the improvement of intraoperative processes the following intervention will be effective in avoiding intraoperative complications                                     |  |  |  | 1 | strongly disagree |
|       |                                                                                                                                                                                  |  |  |  | 2 | disagree          |
|       |                                                                                                                                                                                  |  |  |  | 3 | not decided       |
|       |                                                                                                                                                                                  |  |  |  | 4 | agree             |
|       |                                                                                                                                                                                  |  |  |  | 5 | strongly agree    |
| Q16.4 | Addressing the improvement of intraoperative processes the following intervention will be effective in avoiding intraoperative complications                                     |  |  |  | 1 | strongly disagree |
|       |                                                                                                                                                                                  |  |  |  | 2 | disagree          |
|       |                                                                                                                                                                                  |  |  |  | 3 | not decided       |
|       |                                                                                                                                                                                  |  |  |  | 4 | agree             |
|       |                                                                                                                                                                                  |  |  |  | 5 | strongly agree    |
| Q16.5 | Addressing the improvement of intraoperative processes the following intervention will be effective in avoiding intraoperative complications                                     |  |  |  | 1 | strongly disagree |
|       |                                                                                                                                                                                  |  |  |  | 2 | disagree          |
|       |                                                                                                                                                                                  |  |  |  | 3 | not decided       |
|       |                                                                                                                                                                                  |  |  |  | 4 | agree             |
|       |                                                                                                                                                                                  |  |  |  | 5 | strongly agree    |
| Q16.6 | Addressing the improvement of intraoperative processes the following intervention will be effective in avoiding intraoperative complications                                     |  |  |  | 1 | strongly disagree |
|       |                                                                                                                                                                                  |  |  |  | 2 | disagree          |
|       |                                                                                                                                                                                  |  |  |  | 3 | not decided       |
|       |                                                                                                                                                                                  |  |  |  | 4 | agree             |
|       |                                                                                                                                                                                  |  |  |  | 5 | strongly agree    |
|       |                                                                                                                                                                                  |  |  |  | 1 | no Comment given  |
|       |                                                                                                                                                                                  |  |  |  | 2 | Comment given     |

|       |                                                                                                                                      |   |                   |
|-------|--------------------------------------------------------------------------------------------------------------------------------------|---|-------------------|
| Q17.1 | The following element is a likely pitfall in quality improvement programs for intraoperative processes                               | 1 | strongly disagree |
|       |                                                                                                                                      | 2 | disagree          |
|       |                                                                                                                                      | 3 | not decided       |
|       |                                                                                                                                      | 4 | agree             |
|       |                                                                                                                                      | 5 | strongly agree    |
| Q17.2 | The following element is a likely pitfall in quality improvement programs for intraoperative processes                               | 1 | strongly disagree |
|       |                                                                                                                                      | 2 | disagree          |
|       |                                                                                                                                      | 3 | not decided       |
|       |                                                                                                                                      | 4 | agree             |
|       |                                                                                                                                      | 5 | strongly agree    |
| Q17.3 | The following element is a likely pitfall in quality improvement programs for intraoperative processes                               | 1 | strongly disagree |
|       |                                                                                                                                      | 2 | disagree          |
|       |                                                                                                                                      | 3 | not decided       |
|       |                                                                                                                                      | 4 | agree             |
|       |                                                                                                                                      | 5 | strongly agree    |
| Q17.4 | The following element is a likely pitfall in quality improvement programs for intraoperative processes                               | 1 | strongly disagree |
|       |                                                                                                                                      | 2 | disagree          |
|       |                                                                                                                                      | 3 | not decided       |
|       |                                                                                                                                      | 4 | agree             |
|       |                                                                                                                                      | 5 | strongly agree    |
| Q17.5 | The following element is a likely pitfall in quality improvement programs for intraoperative processes                               | 1 | strongly disagree |
|       |                                                                                                                                      | 2 | disagree          |
|       |                                                                                                                                      | 3 | not decided       |
|       |                                                                                                                                      | 4 | agree             |
|       |                                                                                                                                      | 5 | strongly agree    |
|       |                                                                                                                                      | 1 | no Comment given  |
|       |                                                                                                                                      | 2 | Comment given     |
| Q18.1 | Standardisation of operative procedures should be lead the following team members respectively these team members should be involved | 1 | strongly disagree |
|       |                                                                                                                                      | 2 | disagree          |
|       |                                                                                                                                      | 3 | not decided       |
|       |                                                                                                                                      | 4 | agree             |
|       |                                                                                                                                      | 5 | strongly agree    |
| Q18.2 | Standardisation of operative procedures should be lead the following team members respectively these team members should be involved | 1 | strongly disagree |
|       |                                                                                                                                      | 2 | disagree          |
|       |                                                                                                                                      | 3 | not decided       |
|       |                                                                                                                                      | 4 | agree             |
|       |                                                                                                                                      | 5 | strongly agree    |
| Q18.3 | Standardisation of operative procedures should be lead the following team members respectively these team members should be involved | 1 | strongly disagree |
|       |                                                                                                                                      | 2 | disagree          |
|       |                                                                                                                                      | 3 | not decided       |
|       |                                                                                                                                      | 4 | agree             |
|       |                                                                                                                                      | 5 | strongly agree    |
| Q18.4 | Standardisation of operative procedures should be lead the following team members respectively these team members should be involved | 1 | strongly disagree |
|       |                                                                                                                                      | 2 | disagree          |
|       |                                                                                                                                      | 3 | not decided       |
|       |                                                                                                                                      | 4 | agree             |
|       |                                                                                                                                      | 5 | strongly agree    |
| Q18.5 | Standardisation of operative procedures should be lead the following team members respectively these team members should be involved | 1 | strongly disagree |
|       |                                                                                                                                      | 2 | disagree          |
|       |                                                                                                                                      | 3 | not decided       |
|       |                                                                                                                                      | 4 | agree             |
|       |                                                                                                                                      | 5 | strongly agree    |
|       |                                                                                                                                      | 1 | no Comment given  |

|       |                                                                                                                                                      |  |  |  |   |                                                          |
|-------|------------------------------------------------------------------------------------------------------------------------------------------------------|--|--|--|---|----------------------------------------------------------|
|       |                                                                                                                                                      |  |  |  | 2 | Comment given                                            |
| Q19.1 | The degree of standardisation of surgical procedures should involve the following                                                                    |  |  |  | 1 | strongly disagree                                        |
|       |                                                                                                                                                      |  |  |  | 2 | disagree                                                 |
|       |                                                                                                                                                      |  |  |  | 3 | not decided                                              |
|       |                                                                                                                                                      |  |  |  | 4 | agree                                                    |
|       |                                                                                                                                                      |  |  |  | 5 | strongly agree                                           |
| Q19.2 | The degree of standardisation of surgical procedures should involve the following                                                                    |  |  |  | 1 | strongly disagree                                        |
|       |                                                                                                                                                      |  |  |  | 2 | disagree                                                 |
|       |                                                                                                                                                      |  |  |  | 3 | not decided                                              |
|       |                                                                                                                                                      |  |  |  | 4 | agree                                                    |
|       |                                                                                                                                                      |  |  |  | 5 | strongly agree                                           |
| Q19.3 | The degree of standardisation of surgical procedures should involve the following                                                                    |  |  |  | 1 | strongly disagree                                        |
|       |                                                                                                                                                      |  |  |  | 2 | disagree                                                 |
|       |                                                                                                                                                      |  |  |  | 3 | not decided                                              |
|       |                                                                                                                                                      |  |  |  | 4 | agree                                                    |
|       |                                                                                                                                                      |  |  |  | 5 | strongly agree                                           |
| Q19.4 | The degree of standardisation of surgical procedures should involve the following                                                                    |  |  |  | 1 | strongly disagree                                        |
|       |                                                                                                                                                      |  |  |  | 2 | disagree                                                 |
|       |                                                                                                                                                      |  |  |  | 3 | not decided                                              |
|       |                                                                                                                                                      |  |  |  | 4 | agree                                                    |
|       |                                                                                                                                                      |  |  |  | 5 | strongly agree                                           |
|       |                                                                                                                                                      |  |  |  | 1 | no Comment given                                         |
|       |                                                                                                                                                      |  |  |  | 2 | Comment given                                            |
| Q20.1 | Concerning the future of surgical interventions which elements of standardisation are you expecting to see in clinical practice in the next 20 years |  |  |  | 1 | in 95% of surgical procedures in your specialty          |
|       |                                                                                                                                                      |  |  |  | 2 | in 75% of surgical procedures in your specialty          |
|       |                                                                                                                                                      |  |  |  | 3 | in 50% of surgical procedures in your specialty          |
|       |                                                                                                                                                      |  |  |  | 4 | in 25% of surgical procedures in your specialty          |
|       |                                                                                                                                                      |  |  |  | 5 | in less than 5% of surgical procedures in your specialty |
| Q20.2 | Concerning the future of surgical interventions which elements of standardisation are you expecting to see in clinical practice in the next 20 years |  |  |  | 1 | in 95% of surgical procedures in your specialty          |
|       |                                                                                                                                                      |  |  |  | 2 | in 75% of surgical procedures in your specialty          |
|       |                                                                                                                                                      |  |  |  | 3 | in 50% of surgical procedures in your specialty          |
|       |                                                                                                                                                      |  |  |  | 4 | in 25% of surgical procedures in your specialty          |
|       |                                                                                                                                                      |  |  |  | 5 | in less than 5% of surgical procedures in your specialty |
| Q20.3 | Concerning the future of surgical interventions which elements of standardisation are you expecting to see in clinical practice in the next 20 years |  |  |  | 1 | in 95% of surgical procedures in your specialty          |
|       |                                                                                                                                                      |  |  |  | 2 | in 75% of surgical procedures in your specialty          |
|       |                                                                                                                                                      |  |  |  | 3 | in 50% of surgical procedures in your specialty          |
|       |                                                                                                                                                      |  |  |  | 4 | in 25% of surgical procedures in your specialty          |

|       |                                                                                                                                                      |  |  |  |   |                                                          |
|-------|------------------------------------------------------------------------------------------------------------------------------------------------------|--|--|--|---|----------------------------------------------------------|
|       |                                                                                                                                                      |  |  |  | 5 | in less than 5% of surgical procedures in your specialty |
| Q20.4 | Concerning the future of surgical interventions which elements of standardisation are you expecting to see in clinical practice in the next 20 years |  |  |  | 1 | in 95% of surgical procedures in your specialty          |
|       |                                                                                                                                                      |  |  |  | 2 | in 75% of surgical procedures in your specialty          |
|       |                                                                                                                                                      |  |  |  | 3 | in 50% of surgical procedures in your specialty          |
|       |                                                                                                                                                      |  |  |  | 4 | in 25% of surgical procedures in your specialty          |
|       |                                                                                                                                                      |  |  |  | 5 | in less than 5% of surgical procedures in your specialty |
| Q20.5 | Concerning the future of surgical interventions which elements of standardisation are you expecting to see in clinical practice in the next 20 years |  |  |  | 1 | in 95% of surgical procedures in your specialty          |
|       |                                                                                                                                                      |  |  |  | 2 | in 75% of surgical procedures in your specialty          |
|       |                                                                                                                                                      |  |  |  | 3 | in 50% of surgical procedures in your specialty          |
|       |                                                                                                                                                      |  |  |  | 4 | in 25% of surgical procedures in your specialty          |
|       |                                                                                                                                                      |  |  |  | 5 | in less than 5% of surgical procedures in your specialty |
|       |                                                                                                                                                      |  |  |  | 1 | no Comment given                                         |
|       |                                                                                                                                                      |  |  |  | 2 | Comment given                                            |
| Q21   | Do you have any comments or questions?                                                                                                               |  |  |  | 1 | no Comment given                                         |
|       |                                                                                                                                                      |  |  |  | 2 | Comment given                                            |
